# Supplementary material for: The electrochemical kinetics of cerium selenide nano-pebbles: the design of a device-grade symmetric configured wide-potential flexible solid-state supercapacitor
Source: Royal Society of Chemistry journal article supplement (doi:10.1039/d0na00893a), 2020-12-21
Supplement: d0na00893a1.pdf [file d0na00893a1.pdf]

## Supplementary information

### Electrochemical kinetics of cerium selenide nano-pebbles: Design of device grade symmetric configured wide-potential flexible solid-state supercapacitor

**Bidhan Pandit,<sup>ab</sup> Akanksha Agarwal,<sup>a</sup> Priyanka Patel,<sup>a</sup> Babasaheb R. Sankapal<sup>\*a</sup>**

*<sup>a</sup>Nano Materials and Device Laboratory, Department of Physics, Visvesvaraya National  
Institute of Technology, South Ambazari Road, Nagpur 440010, Maharashtra, India.*

*<sup>b</sup>Institut Charles Gerhardt Montpellier (ICGM), Université de Montpellier, CNRS, Place  
Eugène Bataillon, Montpellier, 34095, Cedex 5, France.*

#### Corresponding author

**Babasaheb R. Sankapal**

E-mail: [brsankapal@phy.vnit.ac.in](mailto:brsankapal@phy.vnit.ac.in); [brsankapal@gmail.com](mailto:brsankapal@gmail.com)

Tel.: +91 (712) 2801170; Fax No.:- +91 (712) 2223230

## S1. Adhesion test

The adherence of the film was checked by using tixo-tape peel-off method. Initially, tixo-tape was stick on upper surface of film and then it was peel-off. The adherence of the film to the stainless steel (SS) substrate was so good that there was very minute change compare to original due to peel-off of some un-adhesive powdery particles from top-surface only. Photos show before and after peel-off image of the film on the SS substrate with no apparent change, exhibiting good adhesion.

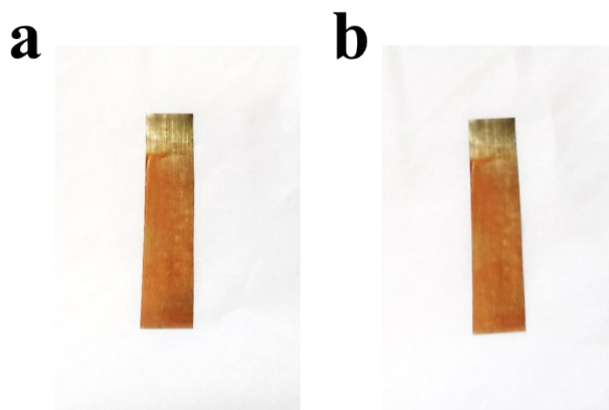

**Figure S1** Electrode (a) before and (b) after peel-off test for adhesion.

## S2. Contact angle analysis

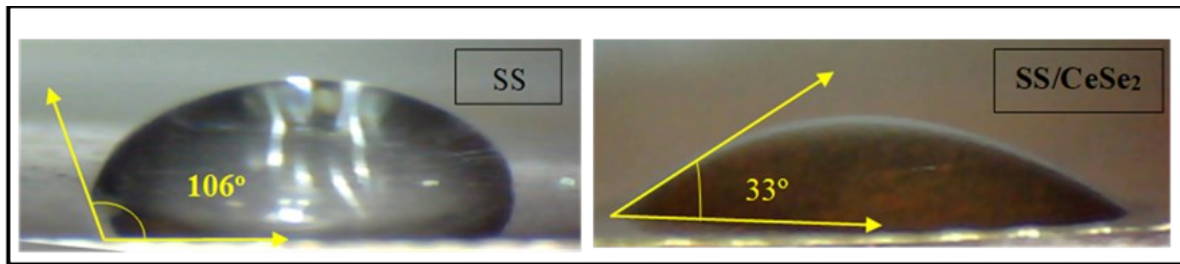

**Figure S2:** Contact angle for bare stainless steel (SS) substrate and SS/CeSe<sub>2</sub> film.

### S3. Electrochemical characterizations

Specific capacitance<sup>1</sup> from the CV curves was calculated with the help of following formula:

$$C_s = \frac{1}{2mv\Delta V} \int_{V_i}^{V_f} I(V)dV \quad (1)$$

where, ' $C_s$ ' signifies the specific capacitance (F/g), ' $m$ ' indicates mass (g) deposited on SS substrate, ' $v$ ' specifies scan rate (V), ' $\Delta V$ ' is an functional potential frame and ' $\int_{V_i}^{V_f} I(V)dV$ ', represents area under the CV curve.

Specific capacitance ( $C_s$ ), specific energy (E) in Wh/kg and specific power (P) in W/kg from Galvanostatic charge-discharge can be calculated using following equations:

$$C_s = \frac{I\Delta t}{m\Delta V} \quad (2)$$

$$E = \frac{1}{2} \left[ \frac{C_s \Delta V^2}{3.6} \right] \quad (3)$$

$$P = \frac{3600 \times E}{\Delta t} \quad (4)$$

where, ' $I$ ' represents current intensity and ' $\Delta t$ ' denotes discharge time (t) of the experimental charge-discharge curve.

**Table S1** Equivalent circuit parameters obtained from calculated EIS spectra for the electrode.

| Material        | R<br>( $\Omega$ ) | CPE                   |      | R<br>( $\Omega$ ) | W<br>( $\Omega$ ) | CPE                    |      | R<br>( $\Omega$ ) | Chi<br>square         |
|-----------------|-------------------|-----------------------|------|-------------------|-------------------|------------------------|------|-------------------|-----------------------|
|                 |                   | $Y_0$ (F)             | n    |                   |                   | $Y_0$ (F)              | n    |                   |                       |
| Cerium selenide | 3.1               | $2.95 \times 10^{-4}$ | 0.86 | 9.24              | 3.91              | $17.15 \times 10^{-4}$ | 0.59 | 47.54             | $9.71 \times 10^{-4}$ |

## References

1. S. Vijayakumar, S.-H. Lee and K.-S. Ryu, *Electrochim. Acta*, 2015, **182**, 979-986.
